# Supplementary material for: Hypomorphic and hypermorphic mouse models of Fsip2 indicate its dosage-dependent roles in sperm tail and acrosome formation
Source: Oxford University Press journal article supplement (doi:10.1242/dev.199216), 2021-06-01
Supplement: dev199216supp.pdf [file dev199216supp.pdf]

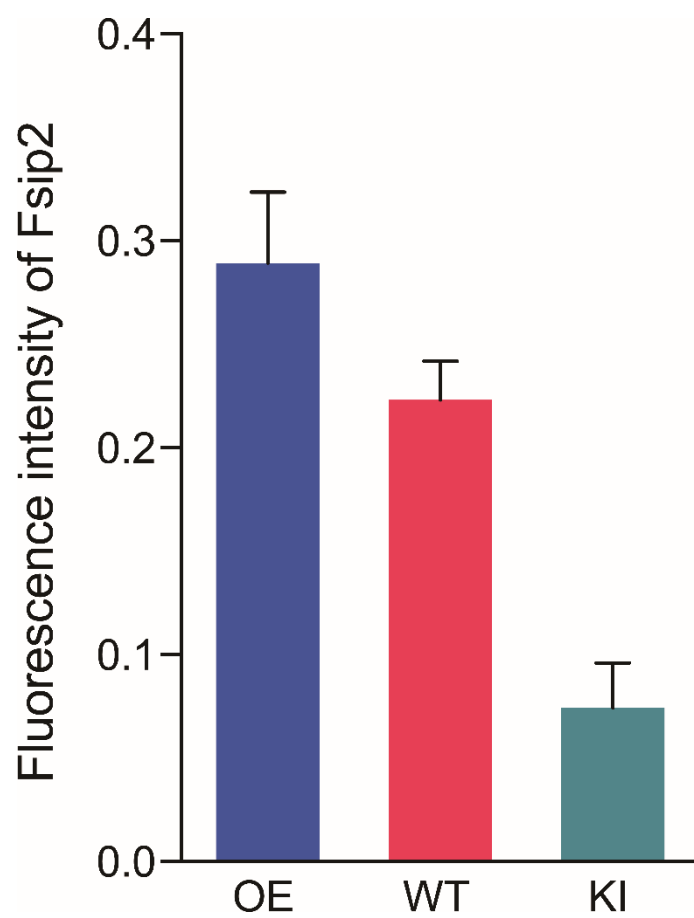

Fig. S1. Fluorescence intensity of Fsp2 of the WT, KI and OE mice sperm.

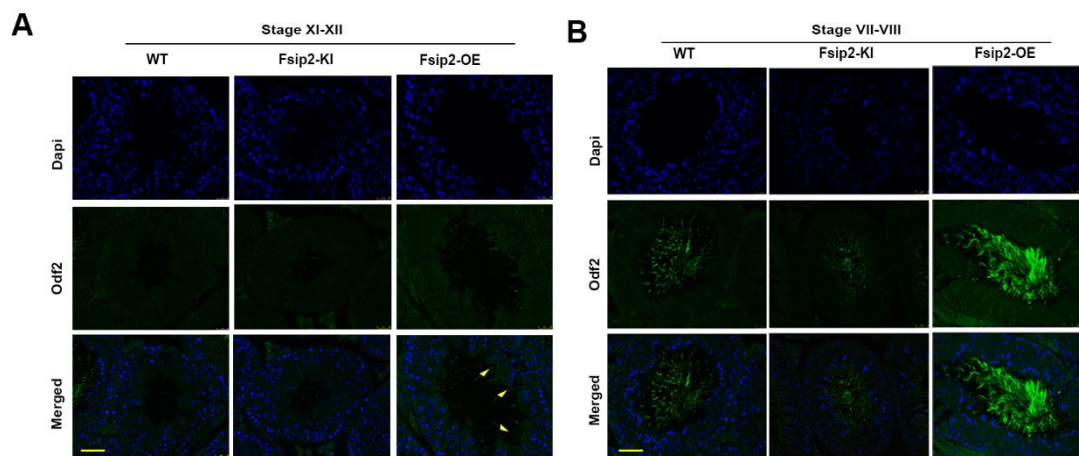

**Fig. S2. Immunofluorescence staining of testicular sections.** (A) Odf2 expression and distribution in the seminiferous tubule at stage XI-XII. Yellow arrows indicate the accelerated development of spermatid. (B) Odf2 expression at stage VII-VIII.

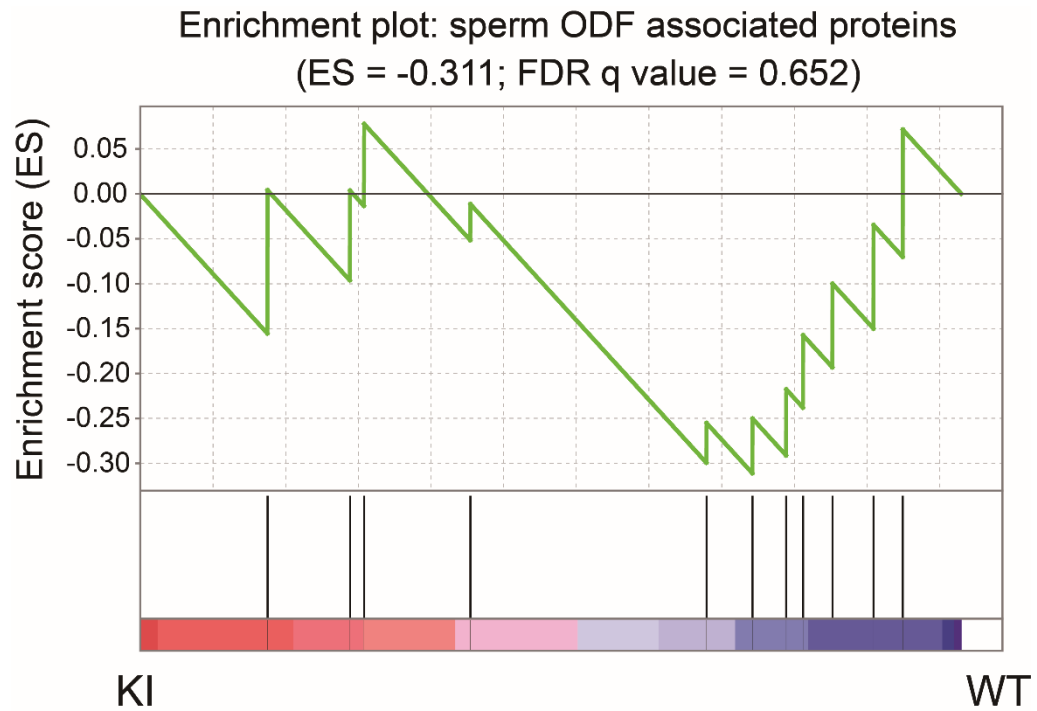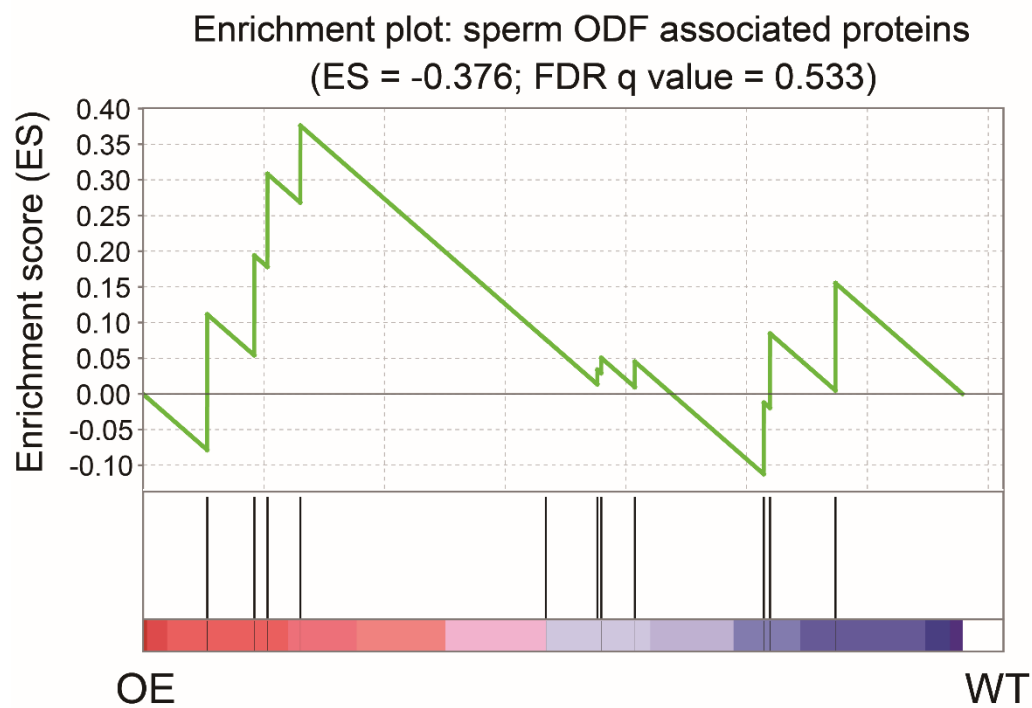

Fig. S3. Gene Set Enrichment Analysis (GSEA) for ODF associated proteins.

**Table S1. Testis weight of WT, KI and OE male**

| Group | Testis Weight/Body Weight (n=11) |         |              |
|-------|----------------------------------|---------|--------------|
|       | Mean±SD                          | P-value | Significance |
| WT    | 0.007503 ± 0.000222              |         |              |
| KI    | 0.007022 ± 0.0003188             | 0.2298a | n.s.         |
| OE    | 0.006927 ± 0.000241              | 0.094b  | n.s.         |

a WT vs KI

b WT vs OE

**Table S2. Top three downregulated genes between the 4 subclusters of Round spermatid of the KI and WT mice.**

| Sub-clusters      | Gene 1       | Gene 2               | Gene 3               |
|-------------------|--------------|----------------------|----------------------|
| Round spermatid 1 | <i>Fsip2</i> | <i>Tcte3</i>         | <i>Tuba3b</i>        |
| Round spermatid 2 | <i>Fsip2</i> | <i>Tcte3</i>         | <i>1700017L05Rik</i> |
| Round spermatid 3 | <i>Fsip2</i> | <i>1700109H08Rik</i> | <i>Gm36368</i>       |
| Round spermatid 4 | <i>Fsip2</i> | <i>Tcte3</i>         | <i>Slx1</i>          |

**Table S3. List of antibodies.**

|    | Antibody                                                                             | Catalog number | Supplier                   | RRID         | WB dilution | IF dilution |
|----|--------------------------------------------------------------------------------------|----------------|----------------------------|--------------|-------------|-------------|
| 1  | Rabbit anti-Fsip2 antibody                                                           | bs-16187R      | Bioss                      | AB_2876860   | -           | 1:100       |
| 2  | Mouse anti-Acrv1 antibody (A-9)                                                      | sc-398536      | Santa Cruz                 | AB_2876861   | -           | 1:20        |
| 3  | Rabbit anti-Akap3 antibody                                                           | 13907-1-AP     | ProteinTech                | AB_2273887   | 1:2000      | 1:100       |
| 4  | Rabbit anti-Akap4 polyclonal antibody                                                | 24986-1-AP     | ProteinTech                | AB_2876859   | 1:2000      | 1:200       |
| 5  | Rabbit anti-Odf2 antibody                                                            | 12058-1-AP     | ProteinTech                | AB_2156630 ) | 1:500       | 1:100       |
| 6  | Rabbit anti-Acrv1 polyclonal antibody                                                | 14040-1-AP     | ProteinTech                | AB_1064042 6 | 1:1000      | -           |
| 7  | Rabbit anti-Cabyr polyclonal antibody                                                | 12351-1-AP     | ProteinTech                | AB_2069257   | 1:5000      | 1:100       |
| 8  | Rabbit anti-Gapdhs polyclonal antibody                                               | 13937-1-AP     | ProteinTech                | AB_2107611   | 1:1000      | 1:100       |
| 9  | Rabbit anti- $\beta$ -Actin (13E5) rabbit mAb                                        | #4970          | Cell Signalling Technology | AB_2223172   | 1:1000      | -           |
| 10 | Goat anti-rabbit IgG (H+L) highly cross-adsorbed secondary antibody, Alexa Fluor 488 | A11034         | Thermo Fisher Scientific   | AB_2576217   | -           | 1:600       |
| 11 | Goat anti-mouse IgG (H+L) cross-adsorbed secondary antibody, Alexa Fluor 568         | A11004         | Invitrogen                 | AB_2534072   | -           | 1:600       |
| 12 | Goat anti-rabbit H&L (HRP)                                                           | IgG ab205718   | Abcam                      | AB_2819160   | 1:10000     | -           |
